# Supplementary material for: The Genetic Structure of Phellinus noxius and Dissemination Pattern of Brown Root Rot Disease in Taiwan
Source: PLoS One. 2015 Oct 20;10(10):e0139445. doi: 10.1371/journal.pone.0139445 (PMC4615629; doi:10.1371/journal.pone.0139445)
Supplement: S2 Table — The allelic fragments for SSR markers are shown as the sizes (bp) of PCR products. For each SSR locus, only the alleles with the first and second greatest fluorescence intensity (data in the first two columns) were used for analyses in the study. The symbol "?" denotes missing data. (XLSX) [file pone.0139445.s004.xlsx]

## Sheet: SSR genotypes
S2 Table. The SSR genotypes of the 329 Phellinus noxius isolates.
The allelic fragments for SSR markers are shown as the sizes (bp) of PCR products. For each SSR locus, only the alleles with the first and second greatest fluorescence intensity (data in the first two columns) were used for analyses in the study. The symbol "?" denotes missing data.
Isolate ID	SSR02	SSR02	SSR02	SSR02	SSR05	SSR05	SSR07	SSR07	SSR07	SSR08	SSR08	SSR08	SSR12	SSR12	SSR16	SSR16	SSR16	SSR19	SSR19	SSR19	SSR27	SSR27	SSR27	SSR27	SSR28	SSR28	SSR28	SSR29	SSR29	SSR29	SSR31	SSR31	SSR31	SSR51	SSR51	SSR51	SSR58	SSR58	SSR61	SSR61	SSR61	SSR61
TC1999RS01	200	200			218	218	135	135		?	?		291	291	282	282		326	326		321	321			226	226		239	239		152	152		?	?		180	180	316	316
TC2004AN02	200	200			218	218	135	135		363	363		291	327	282	282		344	344		318	318			226	226		234	234		152	152		222	222		180	180	313	313
TC2004AN03	200	200			218	218	135	135		363	363		291	291	282	282		344	344		318	318			214	226		234	234		152	152		218	218		180	180	313	313
TC2005SP04	197	200			218	218	135	144		366	366		291	291	282	316		330	330		315	324			226	226		234	234		152	152		222	222		180	180	316	326
TC2005AN05	197	200			218	218	135	144		363	363		291	291	282	282		344	344		?	?			226	226		234	234		152	152		?	?		180	180	313	313
TC2005AN06	197	200			218	218	135	144		363	363		291	327	282	282		342	344		318	318			226	226		234	234		152	152		222	224		180	180	313	313
TC2005MR07	194	216			218	218	135	135		?	?		291	291	282	282		340	340		315	315			232	232		237	239		154	154		222	222		180	180	316	316
TC2006SP08	194	200			218	218	144	144		369	369		291	291	282	282		348	348		315	315			223	223		239	239		152	152		222	222		180	180	316	320	326
TC2006MR09	194	200	191		218	218	135	144		?	?		291	291	?	?		?	?		?	?			226	226		?	?		?	?		?	?		?	?	316	316
TC2006OL10	194	194			218	218	135	135		369	369		291	327	286	286		336	336		321	321			226	226		234	234		152	152		222	222		180	180	316	316
TC2008MR11	191	200			218	218	144	144		363	369		291	291	282	282		326	350	348	318	324			226	229		237	239		152	154		222	222		180	180	313	316
TC2008ST12	191	194			218	218	144	144		363	369		288	288	?	?		?	?		315	330			?	?		234	234		154	154		222	222		180	180	?	?
TC2009CP13	191	191			218	218	144	144		366	366		291	291	282	282		336	350		318	324			226	226		237	237		152	152		222	222		180	180	313	313
TC2009RS14	194	200			218	218	135	144		369	369		288	291	282	296		326	326		321	321			226	226		237	239		152	152		222	222		180	180	313	316
TC2009MR15	200	200			218	218	144	144		366	369	363	291	291	282	316		326	326		?	?			229	229		234	237		152	152		220	220		180	180	320	320
TC2009MR16	200	200			218	218	144	144		366	366		291	291	316	316		326	326		?	?			229	229		237	237		152	152		222	222		180	180	320	320
TC2009MR17	200	200			218	218	144	144		366	366		291	291	316	316		326	326		321	321			223	229		237	237		152	152		222	222		180	180	320	320
TC2009MR18	194	197			218	218	144	144		369	369		291	294	286	286		350	352		327	330			226	226		234	237		152	152		222	222		180	180	316	316
TC2009MR19	191	200			218	218	144	144		366	366		291	291	282	316		336	342		318	330			226	226		237	242		152	152		222	222		180	180	316	326
TC2009LR20	194	194			218	218	144	144		363	366		291	291	282	282		350	357	355	324	336			226	229		237	239		152	154		222	222		180	180	313	313
TC2009MR21	191	191			218	218	135	144		363	369		291	291	282	282		326	326		315	315			226	226		237	237		152	158		222	222		180	180	316	326
TC2009MR22	197	200			218	218	144	144		360	360		288	291	282	282		338	350		321	324			229	229		234	239		152	152		222	222		180	180	316	316
TC2009MR23	194	194			218	224	144	144		366	366		291	327	282	282		338	338		?	?			226	226		237	237		152	152		222	222		200	200	313	313
TC2009MR24	?	?			218	218	144	144		369	369		?	?	?	?		342	342		330	330			226	226		237	237		152	152		234	234		200	203	316	316
TC2009MR25	194	216			218	218	138	144		363	363		291	291	282	282		336	336		315	330	324		232	232		237	237		152	152		222	222		180	200	316	316
TC2009MR26	197	200			218	218	135	144		366	366		291	291	282	282		326	326		318	318			226	232		237	237		152	156		220	220		180	189	316	320
TC2009SP27	191	191			218	218	144	144		363	363		291	291	282	282		?	?		321	321			214	214		231	231		152	152		?	?		?	?	?	?
TC2009MR28	200	200			218	218	135	135		372	372		291	291	282	282		326	352		330	330			211	232		237	237		152	152		222	222		180	180	316	316
TC2009MR29	194	200			218	218	135	135		372	372		291	291	282	282		326	352		321	330			211	232		234	237		152	154		222	222		180	180	316	316
TC2009MR30	191	200			218	218	144	144		369	369		291	294	316	316		334	334		315	318			226	229		237	237		154	154		222	222		180	180	316	316
TC2009PD31	191	191			218	218	144	144		369	369		291	291	282	282		336	350		318	318			229	229		239	239		152	152		222	222		180	180	320	320
TC2009SP32	191	200			218	218	135	135		363	366		291	291	282	286		326	334		330	330			226	226		234	237		152	154		222	236		180	180	316	326
TC2009MR33	191	191			218	218	135	144		363	369		291	291	282	282		326	326		321	327			238	238		237	237		158	158		222	222		180	180	320	320
TC2009SP34	200	200			218	218	144	144		366	366		291	291	?	?		?	?		318	318			?	?		237	237		147	152		222	238		180	180	?	?
TC2009FB35	191	197			218	218	138	144		360	369		291	291	282	282		340	340		315	324			226	226		237	237		152	152		222	222		180	180	316	320
TC2009FB36	191	197			218	218	138	144		369	369		291	291	282	282		340	340		315	324			226	226		237	237		152	152		?	?		180	180	316	320
TC2009MR37	191	191			218	218	144	144		366	366		291	291	316	316		355	357		321	321			226	226		231	231		152	152		222	222		180	180	316	316
TC2009FB38	191	200			218	218	144	144		369	372		291	291	282	316		348	348		324	336			226	229		234	237		152	152		226	226		180	180	316	316
TC2009MR39	188	191			218	218	135	144		363	363		291	291	282	316		334	336		327	327			232	232		239	239		152	154		222	238		180	189	313	320
TC2009PD40	197	197			218	218	144	144		366	366		291	291	282	282		?	?		318	318			226	226		237	268		152	152		222	222		180	180	326	326
TC2009FB41	191	197			218	218	144	144		363	363		291	294	282	282		326	326		327	327			226	226		239	239		152	152		222	222		180	180	320	326
TC2009RS42	191	197			218	218	144	144		363	363		291	294	282	282		326	334	336	327	327			226	226		239	239		152	152		222	222		180	180	320	326
TC2009MR43	194	200			218	218	144	144		369	369		291	291	282	282		338	350		318	327			226	226		234	237		152	152		222	222		200	200	316	316
TC2009ST44	194	200			218	218	144	144		360	360		291	291	282	282		326	326		318	318			229	229		237	239		152	152		222	222		180	180	316	316
TC2009MR45	191	200			218	218	144	144		363	369		291	291	282	282		326	350		318	327			226	229		231	234		152	152		222	222		180	180	316	320
TC2009MR46	191	194			218	254	144	144		372	372		291	291	282	320		326	326		324	324			226	226		237	237		147	152		222	222		180	180	320	320
TC2009MR47	197	232			218	218	144	144		363	369		291	291	282	282		336	350		315	318			226	229	214	234	234		152	152		222	222		180	180	316	326
TC2009MR48	191	197			218	218	144	144		366	366		291	291	316	316		336	336		327	327			226	226		234	234		152	152		222	222		203	206	323	326	320
TC2010MR49	194	194			218	218	144	144		369	369		294	294	282	282		334	334		318	318			226	226		234	234		152	152		?	?		180	180	316	316
TC2010RS50	197	197			218	218	144	144		366	366		291	291	296	296		336	336		327	327			229	229		239	239		152	152		218	222		180	180	320	320
TC2010CS51	194	194			218	224	135	135		363	363		291	291	286	286		334	334		318	318			226	226		234	234		152	152		222	222		180	180	316	326
TC2010ML52	197	197			218	218	144	144		363	363		291	291	282	282		334	334		324	324			214	214		234	234		154	154		222	222		180	180	313	313
TP2009MR01	191	191			218	218	144	144		360	369	366	291	291	282	282		348	350		327	327			229	229		231	231		152	152		222	222		180	180	313	316
TP2010MR02	191	191			218	218	135	144		369	369		291	291	286	312		326	350	348	321	321			226	226		237	237		152	156		226	226		180	180	313	316
TP2010MR03	194	200			218	221	135	135		363	363		291	291	282	282		326	326		318	318			232	232		234	234		152	158		222	222		180	180	313	316
TP2010MR04	194	200			218	224	135	135		369	369		291	291	282	282		336	348		324	324			226	226		237	237		152	152		222	222		180	180	326	329
TP2010RS05	197	197			218	218	138	144		366	366		291	291	282	282		326	350		318	330			226	226		228	237		152	152		220	222		180	180	316	326
TP2010FB06	194	200			218	218	144	144		366	372		291	291	290	300		334	338		327	327			229	229		234	237		152	156		222	222		180	203	316	326
TP2010UNK07	194	197	200		218	218	144	144		363	369		291	294	282	282		348	350		?	?			226	226		237	237		216	216		222	222		180	180	320	320
TP2010UNK08	191	191			218	218	144	144		363	369		291	291	282	282		342	348		318	327			226	226		237	237		216	216		222	222		180	180	316	316
TP2010UNK09	197	197			218	221	144	144		363	366		291	291	282	290		350	350		324	324			226	226		234	234		152	152		220	220		180	180	326	326
TP2010AR10	200	200			224	224	135	135		366	366		291	294	296	296		334	334		315	315			226	226		231	231		152	152		220	220		180	180	316	316
TP2010MR11	191	191			218	224	144	144		366	366		291	291	282	282		334	336		321	324			226	226		237	240		152	158		220	222		?	?	316	320
TP2010MR12	194	194			218	221	144	144		363	366		291	291	286	286		340	340		327	327			229	229		234	234		152	152		222	222		180	180	320	320
TP2010UNK13	194	194			218	221	144	144		363	366		291	291	286	286		330	330		321	321			226	226		237	237		152	152		?	?		180	180	316	316
TP2010MR14	191	191			218	221	144	144		363	366		291	291	282	290		334	336		321	324			226	226		237	239		?	?		220	222		180	180	316	316
TP2010MR15	191	191			218	221	144	144		363	366		291	291	282	290		334	336		321	324			226	226		237	239		?	?		220	220		180	180	316	316
TP2010MR16	191	191			218	221	144	144		363	366	369	291	291	282	290		334	336		321	324			226	226		237	239		152	156		220	222		180	180	316	316
TP2010UNK17	200	200			218	221	144	144		363	363		291	291	290	290		350	350		327	327			229	229		237	237		158	158		222	222		?	?	320	320
TP2010MR18	191	197			218	218	144	144		363	366		291	291	282	290		350	350		321	327			226	226		?	?		?	?		222	222		180	180	316	316
TP2010FB19	194	197			218	218	144	144		369	369		291	291	282	282		334	348		321	327			226	226		237	237		152	152		?	?		180	180	316	316
TP2010FB20	194	200			218	218	135	135		363	363		291	291	282	282		326	326		321	321			229	229		237	237		158	158		222	257		180	180	316	326
TP2010MR21	194	200			218	218	135	135		363	369		291	291	282	282		326	326		321	321			229	229		237	237		158	158		257	257		180	180	316	326
TP2010FB22	194	200			218	218	135	144		363	366	369	291	291	282	282		326	326		321	321			229	229		237	237		158	158		222	222		180	180	316	326
TP2010MR23	191	194			218	218	144	144		363	363		291	291	282	282		348	350		315	333			226	226		234	237		152	158		222	222		180	180	316	320
TP2011LR24	200	200			218	218	135	144		363	366		291	291	282	316		326	326		315	330			229	229		234	237		152	154		224	224		180	180	313	313
TP2011PD25	200	200			218	218	135	144		363	366		286	291	282	316		355	357	344	315	330			229	229		234	237		152	154		224	224		180	180	313	313
TP2011MR26	191	191			218	218	135	144		369	369		291	291	286	312		342	350		327	327			226	226		237	237		152	156		220	222		180	180	316	316
TP2011MY27	194	200			218	218	135	135		363	363		291	291	282	282		326	326		318	327			229	232		237	237		152	156		222	222		180	180	320	320
TP2011MY28	194	200			218	218	135	135		363	363		291	291	282	282		326	326		318	327			229	232		237	237		152	156		222	222		180	180	320	320
TP2011HM29	191	191			218	218	135	135		369	369		291	291	282	282		326	326		315	324			226	229		234	239		156	158		220	222		180	189	316	320	313
TP2011HM30	191	194			218	218	135	144		369	369		291	291	282	282		350	350		315	324			226	226		234	239		156	209	158	220	222		180	189	316	320
TP2011HM31	191	194			218	218	135	144		369	369		291	291	282	282		326	350		315	324			226	226		234	239		156	158		224	224		180	189	316	320
TP2011HM32	191	191			218	218	144	144		363	369		291	291	282	282		350	350		327	327			226	226		239	239		152	152		220	222		180	180	320	320
TP2011HM33	200	200			218	218	144	144		366	369		291	291	282	282		326	350		315	321			226	226		237	237		152	152		220	222		180	180	316	320
TP2011CM34	200	200			218	218	144	144		363	363		294	294	?	?		326	326		318	318			226	226		234	234		152	152		222	257		180	180	316	316
TP2011SP35	191	191			218	221	144	144		363	363		291	291	282	282		348	348		321	321			229	229		234	234		152	152		222	222		180	180	316	316
TP2011LR36	191	200			218	218	135	144		360	372		291	291	284	284		338	338		315	318			229	229		234	239		152	154		220	222		180	206	316	316
TP2011LR37	194	194			218	218	144	144		369	372		291	291	282	282		348	348		321	321			226	226		237	237		152	156		222	257		180	180	316	316
TP2011SP38	194	197			218	218	144	144		363	369		291	291	282	282		336	350		324	330			229	229		237	237		152	152		220	222		200	200	316	326
TP2011FB39	191	191			218	218	135	135		369	369		291	291	286	286		340	348		327	327			226	232		237	242		152	156		222	222		180	180	313	316
TP2011MR40	197	197			218	218	144	144		366	369		291	291	282	286		326	344		315	321			226	226		234	234		152	152		222	222		180	180	320	332
TP2011MR41	197	197			218	218	144	144		365	365		291	291	282	286		?	?		315	321			226	226		234	234		152	152		222	222		180	189	320	320
TP2011MR42	191	200			218	218	144	144		366	369		294	294	282	286		340	357		318	330			226	226		234	234		152	152		222	222		180	180	320	320
TP2011MR43	194	194			218	218	144	144		366	366		291	291	282	282		326	326		321	321			226	226		239	239		152	156		222	222		180	180	313	316
TP2011MR44	194	194			218	218	144	144		369	369		291	291	282	282		326	326		324	324			226	226		234	239		152	152		222	222		180	180	313	326
TP2011MR45	194	194			218	218	144	144		369	369		291	291	282	282		326	326		324	324			226	226		239	239		152	152		222	257		180	180	313	313
TP2011MR46	194	194			218	218	144	144		369	369		291	291	282	282		326	326		324	324			226	226		234	239		152	152		222	222		180	180	313	326
TP2011LR47	194	194			218	218	135	135		363	369		291	291	282	282		326	326		315	327			208	226		237	237		152	160		220	222		180	180	322	322
TP2011MR48	191	191			218	218	135	144		369	369		291	291	286	312		342	350	348	327	327			226	226		237	237		152	156		222	222		180	180	316	316
TP2011SP49	191	194			218	218	144	144		366	366		291	194	282	282		340	359		318	324			226	226		234	237		154	158		222	222		180	180	320	320
TP2011CP50	194	194			218	218	144	150		360	369		291	291	308	316		350	350		321	324			229	229		228	228		156	156		222	222		180	180	316	316
TP2011MR51	197	197			218	218	144	144		363	363		291	291	316	316		326	340		315	321			226	226		237	237		152	156		222	231		180	215	313	313
TP2011MR52	191	191			218	218	144	144		369	369		291	291	286	286		326	336		327	330			214	226		234	234		152	152		222	222		180	180	316	316
TP2011LR53	200	200			218	254	144	144		369	369		291	291	282	282		?	?		318	327			226	226		237	237		152	158		222	222		180	180	316	326
TP2011MR54	191	191			218	224	144	144		369	369		291	291	261	261		338	338		?	?			229	229		237	237		152	152		222	222		180	180	316	326
TP2011MR55	191	191			218	218	135	135		372	372		291	294	282	282		326	336	342	327	336			226	226		237	237		152	152		222	222		180	180	316	326
TP2011MR56	191	191			218	218	135	144		363	363		291	291	282	282		326	326		321	321			229	229		234	237		152	152		222	222		180	227	316	316
TP2011RT57	191	191			218	218	135	144		363	363		291	291	282	282		326	326		321	321			229	229		234	237		152	152		222	222		180	227	316	316
TP2011RT58	191	191			218	218	135	135		363	363		291	291	282	282		326	326		321	321			229	229		237	237		152	152		222	222		227	227	316	316
TP2011LR59	191	200			218	218	144	144		360	363		291	291	282	316		342	350		327	327			226	232		234	234		152	152		222	222		180	180	316	320
TP2011MR60	191	194			218	221	144	144		369	369		291	291	282	282		336	336		315	336			223	223		234	237		154	158		224	224		180	180	316	323
TP2011MR61	197	200			218	218	135	144		363	363		291	291	286	286		336	336		315	315			229	229		237	237		152	152		?	?		180	180	316	316
TP2011MR62	191	191			218	218	135	144		363	369		291	291	282	282		326	338		324	324			229	229		234	237		152	152		222	222		180	180	316	316
TP2011MR63	191	191			218	218	144	144		366	366		291	291	282	282		326	348		315	315			226	226		234	237		152	154		222	222		180	180	316	316
TP2011MR64	191	194			218	218	135	144		369	369		291	291	282	282		350	350		315	324			226	226		234	239		156	158		222	231		180	189	316	320
TP2011MR65	188	188			218	218	144	144		366	366		291	291	282	282		326	326		324	324			226	226		237	237		152	152		222	222		180	180	313	313
TP2011MR66	200	200			218	218	135	144		363	366		291	291	282	316		326	326		315	330			229	229		234	237		152	154		224	224		180	180	313	313
TP2011PD67	200	200			218	218	144	144		366	366		291	291	316	316		326	340		315	315			229	229		237	237		154	154		224	224		180	180	316	320
TP2011LR68	200	200			218	218	135	144		363	366	369	291	291	282	316		340	357		315	330			229	229		234	237		152	154		224	224		180	180	313	313
TP2011MR69	194	200			218	218	144	144		363	363		291	291	282	286		326	326		324	324			226	226		237	237		152	152		222	222		180	180	326	326
TP2011MR70	194	200			218	218	135	144		363	363		?	?	282	286		334	342		324	324			226	226		231	237		152	152		222	222		180	180	326	326
TP2011MR71	194	200			218	218	135	144		363	363		291	291	282	286		334	340		324	324			226	226		231	237		152	152		222	222		180	180	326	326
TP2011MR72	194	200			218	218	135	144		363	363		291	291	282	286		334	340		320	324			226	226		231	237		152	152		222	222		180	180	326	326
TP2011MR73	194	200			218	218	144	144		363	369		291	291	282	286		326	326		324	324			226	226		231	237		152	152		222	222		180	180	326	326
TP2011MR74	194	200			218	218	135	144		363	363		291	291	282	286		334	340		320	324			226	226		231	237		152	152		222	222		180	180	326	326
TP2011MR75	194	200			218	218	135	144		363	363		291	291	282	286		334	340		320	324			226	226		231	237		152	152		222	222		180	180	326	326
TP2011MR76	194	200			218	218	144	144		363	369		291	291	261	282		357	357		315	315			208	208		237	237		152	152		222	222		180	180	320	320
TP2012MR77	191	191			218	218	135	135		363	372		?	?	290	290		326	336		321	321			226	229		234	237		152	226		222	222		180	227	316	326
TP2012MR78	191	191			218	218	135	144		363	363		291	291	282	282		326	348	334	321	321			229	229		234	237		152	152		222	222		180	227	316	316
TP2012CM79	191	191			218	218	144	144		363	363		291	327	282	286		338	342		318	324			229	229		234	239		152	158		222	222		180	180	316	326
TP2012RS80	197	197			218	218	144	144		363	369		291	291	282	282		326	348		327	330			226	226		234	234		152	152		222	257		180	180	316	320
TP2012TH81	191	191			218	218	135	144		372	372		291	294	282	282		334	334		327	336			226	226		237	237		152	152		222	222		180	180	316	326
TP2012LR82	197	200			218	218	144	144		369	369		291	327	282	282		326	326		318	327			226	226		237	237		152	158		222	222		180	180	316	326
TP2012LR83	197	200			218	224	144	144		369	369		291	291	282	282		326	326		318	327			226	226		237	268		152	158		222	222		180	180	316	326
TP2012EL84	191	206	200	194	218	218	135	144		363	369		291	291	282	282		326	326		315	327	330		226	229		234	237		152	152		224	224		180	180	316	326
TP2012LR85	188	188			218	218	144	144		360	360		291	291	282	282		?	?		312	324			205	226		234	234		156	156		220	222	231	?	?	313	320
TP2012UL86	200	200			218	218	135	135		363	363		291	291	282	286		334	334		321	321			226	226		237	239		152	152		222	222		180	180	316	326
TP2012FB87	191	194			218	218	135	144		369	369		291	291	282	282		350	350		315	324			226	226		234	239		152	152		220	222		180	189	316	320
TP2012FB88	200	200			218	218	144	144		366	366		291	291	282	282		326	326		315	327			226	226		237	237		152	152		222	222		180	180	313	316	326
TP2012FB89	200	200			218	218	144	144		366	366		291	291	282	282		326	326		315	327			226	226		237	237		152	152		220	222		180	180	316	316
TP2012MR90	194	200			218	218	144	144		369	369		288	291	282	286		330	348	338	315	327			223	226		237	237		156	158		222	222		180	180	316	316
TP2012MR91	191	194			218	218	135	144		369	369		291	327	282	316		334	334		318	321			223	223		231	237		147	152		222	222		180	180	313	320
TP2012MR92	194	194			218	221	144	144		?	?		291	291	282	290		326	326		321	324			226	226		237	237		152	152		222	257		180	180	326	326
TT1996AO01	194	200			218	218	144	144		363	363		?	?	282	282		340	340		318	321			223	226		237	237		152	152		224	224		180	212	316	320
TT1996ST02	191	191			218	218	135	144		363	363		291	291	282	282		330	338		321	330			226	229		234	237		147	152		222	238		180	180	313	316
TT2009MR03	191	194			218	218	135	144		363	366		291	291	282	282		336	350		324	324			226	229		234	234		154	158		222	222		180	189	316	316
TT2009FB04	191	194			218	218	144	144		363	363		291	291	282	282		340	344		324	324			229	229		234	237		152	152		222	257		180	180	313	316
TT2009MR05	197	197			218	218	144	144		366	366		291	291	282	282		348	348		318	330			229	229		234	237		152	152		222	222		180	180	313	313
TT2009LR06	194	194			218	218	144	144		363	369		291	294	282	282		336	342		321	321			229	229		237	237		152	152		220	220		180	212	323	323
TT2009LR07	194	194			218	218	144	144		363	366	369	291	294	282	282		336	342		321	321			229	229		237	237		152	152		220	220		180	212	316	323
TT2009RS08	?	?			218	218	144	144		369	369		291	291	320	320		340	340		315	315			229	229		234	237		150	150		222	222		180	180	316	320
TT2010ER09	194	194			218	224	135	135		363	369		291	291	282	282		338	338		318	324			229	229		237	237		152	158		222	222		180	180	316	326
TT2010OL10	194	194			218	218	135	135		366	366		?	?	282	282		336	350		315	315			226	226		231	237		152	158		220	222		180	180	304	304
TT2010EP11	191	191			218	218	144	144		363	369		291	291	282	282		336	336		321	327			229	229		237	237		152	152		222	222		180	180	316	316
TT2010LR12	191	191			218	221	135	135		366	366		291	291	282	282		?	?		318	318			223	223		234	237		152	209		222	222		180	180	316	329
TT2010LR13	191	191			218	218	144	144		366	366		291	291	282	282		334	350		336	336			226	226		234	234		152	154		222	222		180	180	316	326
TT2010CP14	194	194			218	218	135	144		363	369		291	291	282	282		326	350		321	321			223	223		234	234		152	154		222	222		180	180	316	316
TT2010MR15	194	200			218	218	144	144		?	?		291	291	282	282		350	350		327	327			226	226		237	237		158	158		222	222		180	180	313	313
TT2010MR16	194	200			218	218	144	144		?	?		291	291	282	282		350	350		327	327			226	226		237	237		158	158		222	222		180	180	313	313
TT2010FB17	194	200			218	218	144	144		363	363		291	291	282	286		326	326		315	315			223	229		239	239		152	152		222	222		180	180	316	326
TT2010HM18	191	191			218	218	144	144		363	369		291	291	282	282		336	336		321	327			229	229		237	268		152	152		222	222		180	180	316	316
TT2010LR19	197	197			218	218	144	144		369	369		291	291	282	282		350	350		324	330			226	229		228	237		152	152		222	222		180	180	320	320
TN1989SP01	197	200	194		218	224	135	144		366	366		291	294	282	296		336	336		318	327	324		223	226		234	237		152	152		222	222		180	180	313	316	326
TN1990SP02	197	197			218	218	144	144		369	369		294	294	282	282		330	342	344	318	318			223	223		234	234		152	152		222	222		180	180	316	316
TN1992OX03	200	200			218	218	144	144		?	?		291	291	282	282		326	348		321	327	330		226	226		237	237		152	152		224	224		180	180	320	326	316
TN2003RT04	197	197			218	218	144	144		369	369		291	291	282	282		326	336		318	327			226	226		234	234		152	152		222	222		180	180	316	316
TN2003RT05	200	200			218	218	144	144		366	369		291	291	286	286		326	326		330	330			229	229		234	234		152	152		224	224		180	189	316	316
YL2009MR01	197	197			218	218	135	135		360	369		291	327	282	282		?	?		315	315			226	226		234	234		152	152		222	222		?	?	?	?
YL2009LR02	191	200			218	224	135	144		360	363		291	291	282	282		336	342		315	315			229	229		234	234		152	154		220	222		200	200	316	329
YL2009TX03	191	191			218	218	144	144		363	369		291	291	282	282		326	340		321	321			226	226		234	234		158	158		222	222		180	180	313	326
YL2009MR04	191	200			218	218	144	144		366	372		291	291	282	282		338	342		315	321			226	229		234	239		?	?		222	222		180	180	313	316
YL2009LR05	191	194			?	?	144	144		363	369		291	291	282	282		336	336		321	330			226	226		234	237		152	154		224	224		180	180	313	316
YL2009BM06	191	191			218	218	135	135		369	369		291	291	282	282		344	344		318	318			226	226		234	234		152	152		222	222		180	180	320	320
YL2009MR07	191	194			218	218	144	144		366	369		291	291	282	316		344	344		315	315			229	229		237	237		154	158		222	222		180	180	316	320
YL2009MR08	194	194			218	218	144	144		366	369		291	291	282	282		326	326		330	330			229	229		231	231		152	152		222	222		180	180	313	313
YL2009MR09	194	200			218	218	144	144		369	369		291	294	282	282		334	334		321	330	327		226	226		228	234		152	158		222	222		180	180	316	316
YL2009MR10	200	200			218	218	144	144		363	363		291	294	290	290		326	326		330	330			226	229		234	237		147	152		222	224		206	206	316	316
YL2009EP11	191	194			218	218	144	144		363	363		291	291	282	282		?	?		321	324			217	229		239	239		152	158		220	220		180	180	320	320
YL2009UNK12	194	200			218	218	144	144		363	369		291	294	282	282		348	350		324	330			223	226		234	237		152	152		222	222		180	180	326	326
YL2009UNK13	191	206			218	218	135	144		363	369		291	291	282	282		326	350		327	330			226	229		237	237		152	152		224	224		180	180	326	326
YL2009RS14	191	191			218	218	144	144		363	369		291	291	282	282		342	342		315	324			223	223		239	239		152	152		224	224		180	180	313	313
YL2009CM15	191	194			218	218	144	144		363	369		291	291	282	282		?	?		321	327			229	229		234	237		152	152		222	222		180	180	316	320
YL2009MR16	?	?			218	218	144	144		363	372		291	291	282	282		338	342		315	321			226	229		234	239		154	158		222	222		180	180	313	316
YL2009HM17	194	194			218	218	135	144		360	369		291	291	286	286		340	350		324	324			229	235		231	242		158	158		222	222		180	180	316	316
YL2009MR18	191	194			218	218	144	144		363	369		291	291	282	282		326	350		318	318			226	229		237	237		152	152		222	222		180	180	316	320	313
YL2009MR19	191	191			218	218	144	144		369	369		291	291	282	282		?	?		327	327			223	223		237	237		152	152		222	222		180	180	320	320
YL2009UNK20	191	194			218	218	144	144		369	369		291	294	282	282		326	326		321	330			226	226		237	237		152	158		224	224		180	180	316	326
YL2009FB21	194	200			218	221	138	144		366	366		291	291	282	282		330	330		321	321			226	229		228	234		152	156		222	222		180	180	316	316
YL2009MR22	191	191			218	218	144	144		363	363		291	291	?	?		348	348		318	318			223	223		234	234		152	152		?	?		180	180	313	316
YL2009LY23	191	200			218	218	144	144		363	363		291	291	296	316		326	334		324	327			226	226		234	234		152	156		222	224		180	180	316	316
YL2009LR24	188	191			218	218	144	144		363	363		291	291	282	296		326	350		315	327			226	226		234	237		152	152		222	222		180	200	313	320	316
YL2009MR25	194	194			218	218	144	144		366	366		288	291	282	282		342	350		315	321			226	226		237	237		152	152		222	222		180	180	313	313
YL2009AR26	191	191			218	218	135	144		363	363		291	291	282	282		348	348		315	324			229	229		231	237		152	152		222	222		180	180	313	313
YL2009SP27	188	191			218	224	144	144		369	369		291	291	282	286		326	326		321	324			226	226		237	237		152	158		222	222		180	200	320	326
YL2009MR28	191	194			218	221	144	144		363	363		291	291	282	282		336	336		318	321			223	226		234	239		152	152		222	222		180	180	313	326
YL2009FB29	197	197			218	218	135	144		366	369		291	291	282	282		336	344		318	324			226	226		234	237		152	152		222	222		200	200	316	316
YL2009FB30	194	194			?	?	144	144		369	369		291	291	282	282		340	340		318	318			226	229		237	237		152	158		?	?		180	180	?	?
YL2009UNK31	194	216			?	?	135	144		?	?		291	291	282	282		336	350		324	327			223	229		234	234		152	152		222	222		180	180	313	313
YL2009MR32	197	197			218	218	144	144		363	369		291	291	282	282		326	344		321	324			226	226		237	237		152	158		222	222		180	206	313	313
YL2009LR33	194	197			218	218	135	135		363	375		291	291	282	282		326	326		321	324			226	226		237	237		152	154		222	222		206	209	316	320
YL2009FB34	194	197			218	218	144	144		363	369		291	291	282	282		340	340		315	318			229	229		234	234		158	158		222	222		180	180	316	316
YL2009MR35	191	200			218	224	135	144		360	363		291	294	282	282		326	326		315	330			226	229		234	234		152	158		222	222		180	180	320	329
YL2009SP36	191	194			?	?	144	144		363	366		291	291	282	282		326	336		318	327			226	229		234	237		152	152		222	222		180	180	313	316
YL2009SP37	194	194			218	218	144	144		363	363		291	291	282	286		336	336		318	327			223	232		234	234		152	152		222	222		180	180	316	320
YL2009MR38	191	200			218	218	138	144		360	366		291	327	282	282		346	348		315	324			229	232		228	234		152	152		222	222		180	180	313	326
YL2009MR39	194	197			218	218	144	144		363	366		291	291	282	286		338	338		324	327			226	232		228	237		152	158		222	222		180	206	320	320
YL2009SP40	194	194			218	218	144	144		363	363		291	291	282	282		326	336		315	315			226	226		239	239		152	158		222	222		180	180	326	326
YL2009UNK41	197	200			218	224	144	144		363	363		291	294	282	282		326	326		315	321			226	229		234	237		152	152		224	224		180	180	316	316
YL2009UNK42	191	194			218	218	144	144		366	366		291	291	282	282		342	342		321	327			226	226		237	237		152	152		222	222		180	206	320	326
YL2009UNK43	194	200			218	218	135	144		363	363		288	291	282	282		326	342		324	327			226	229		237	237		152	152		222	222		180	180	313	313
YL2009UNK44	191	206			218	218	141	144		369	369		291	291	282	282		334	334		315	327			226	226		234	237		152	152		222	222		180	180	316	320
YL2010MR45	191	200			218	218	135	144		363	363		291	291	282	282		334	340		315	318			226	226		231	237		152	158		222	222		180	180	316	316
HL2005SP01	200	200			218	218	135	135		369	369		291	291	282	282		326	326		321	321			226	226		237	237		152	152		220	220		180	180	320	320
HL2005LR02	194	200			218	218	144	144		366	366		291	291	282	282		336	338		327	327			229	229		237	237		152	152		222	224		180	180	320	320
HL2005FB03	191	194			218	218	135	144		369	369		291	291	282	282		326	344		327	327			226	226		228	228		152	152		222	222		180	180	320	326
NT1996PT01	200	200			218	218	144	144		366	369		291	327	282	282		334	334		321	327			226	226		234	237		152	152		222	222		180	212	313	313
NT1996FB02	191	191			218	218	144	144		363	363		294	294	282	282		357	357		324	324			226	226		228	228		158	158		222	222		180	180	316	316
NT1996RS03	191	197			?	?	?	?		?	?		291	291	?	?		326	334		?	?			226	229		237	237		152	152		?	?		180	180	320	320
NT1999RS04	194	197	200		218	218	135	144		?	?		291	291	282	316		326	342	348	318	336			226	226		234	237		152	152		222	238		189	189	316	326	320
NT1999VT05	191	194			218	218	144	144		363	363		291	291	282	282		326	336		321	327			229	229		237	237		152	154		222	224		180	180	316	326
NT2003MR06	191	194			218	218	135	144		363	369		291	327	282	286		350	350		318	324			226	226		239	257		152	152		222	222		180	180	316	326
NT2004MR07	191	191			218	218	135	135		363	363		291	291	282	282		348	350		321	321			226	226		234	234		152	152		222	222		180	180	316	326	320
NT2005LR08	194	194			218	218	144	144		366	369		291	291	282	282		336	350		315	315			226	226		239	239		154	154		222	222		180	180	320	320
NT2005FB09	191	197			218	218	135	144		363	363		291	291	282	282		350	350		315	330			226	226		234	234		152	158		222	222		200	206	313	313
NT2006LR10	194	194			218	218	144	144		363	363		291	291	316	316		336	336		321	321			226	226		231	237		154	154		222	222		180	180	316	329	313
NT2006OL11	?	?			218	218	135	144		363	363		291	291	282	282		334	344		318	327			226	226		234	239	237	152	152		222	222		180	180	313	316
NT2007AN12	194	200			218	218	144	144		360	360		291	327	282	282		338	350		315	315			226	229		237	237		152	156		220	220		180	180	316	316
NT2007CP13	194	200			218	218	144	144		369	369		291	291	282	282		334	348		315	330	321		226	235		234	239	237	152	152		222	222		180	189	313	316
NT2009RT14	191	191			218	218	144	144		363	369		294	330	282	282		326	326		315	318			226	226		231	237		152	154		222	222		180	200	320	326
NT2010MR15	191	191			218	218	144	144		363	363		288	288	?	?		326	326		321	321			214	214		237	237		152	152		236	236		180	180	316	316
NT2010MR16	191	191			218	218	144	144		360	369		291	327	282	282		350	350		324	324			226	226		228	237		152	152		218	234		180	180	320	320
PT2003LR01	197	197			218	218	144	144		363	363		294	294	282	282		346	348		315	321			226	226		237	237		160	160		222	222		180	180	313	313
PT2010SP02	194	200			218	218	135	144		363	363		291	291	282	282		348	350		330	339			226	226		237	237		152	154		222	222		180	189	316	326
PT2010SP03	191	194			218	218	141	144		366	366		291	291	282	282		357	357		318	324			226	226		234	237		152	156		222	222		180	180	313	313
ML2003MR01	191	194			218	218	144	144		363	369		291	291	282	282		336	336		315	330			226	238		237	237		152	152		222	222		180	180	316	320
ML2010OL02	197	200			218	218	135	144		363	369		291	291	282	282		334	334		327	327			214	226		237	237		152	158		218	238		180	180	316	320
ML2010MR03	194	216			218	218	144	144		363	369		291	291	282	282		336	336		315	330			226	238		237	237		152	152		?	?		180	180	316	320
ML2010SP04	194	194			218	218	144	144		369	369		291	291	316	316		338	338		318	318			226	226		237	237		152	152		222	222		180	180	326	326
ML2010MY05	194	200			218	218	144	144		369	369		291	291	282	282		326	326		315	318			226	229		228	237		152	152		222	222		180	180	316	316
ML2010MR06	191	200			218	218	144	144		363	363		291	291	282	282		348	350		321	327			226	229		237	242		152	152		222	222		180	200	316	316
ML2010LR07	194	194			218	218	144	144		363	363		?	?	320	320		336	336		336	336			226	226		237	237		152	152		222	222		180	180	313	316	320
ML2010FG08	194	194			218	218	135	144		363	369		291	291	282	296		326	334		324	324			226	226		234	234		152	152		222	222		180	180	326	326
ML2010FB09	200	200			218	218	144	144		366	366		291	291	282	282		336	336		327	327			226	226		234	239		152	158		222	222		180	180	320	320
ML2010MR10	194	194			218	218	144	144		363	363		291	291	282	282		350	350		318	318			226	226		234	234		152	152		222	222		180	180	320	320
ML2010MR11	191	194			218	218	135	135		363	363		291	291	282	282		350	352		315	315			229	229		237	237		152	152		222	222		180	180	316	316
ML2010MR12	194	194			218	218	135	144		363	369		291	291	282	290		326	350		318	324			226	226		228	239		152	152		222	222		180	180	316	320
ML2010ST13	191	194			218	218	144	144		363	369		291	291	282	282		336	342		315	330			229	229		231	231		152	152		222	226		189	189	316	316
ML2010ST14	191	200			218	218	144	144		363	363		291	294	282	282		348	350		315	336			226	226		234	239		152	156		222	222		180	180	316	316
ML2010MR15	194	194			218	218	144	144		363	366		291	291	282	282		350	350		318	324			226	229		231	237		147	152		220	220		180	180	316	326
ML2010FB16	191	197			218	218	144	144		363	369		291	291	282	286		336	340		318	327			226	226		237	237		152	158		222	222		180	180	316	320
ML2010SP17	191	200			218	218	144	144		366	366		291	291	282	286		330	342		321	330			229	229		237	237		152	152		222	222		180	200	313	316
ML2010UL18	194	200			218	218	144	144		366	366		291	291	282	282		326	326		330	330			226	226		237	237		152	152		222	222		180	200	316	320
ML2010MR19	191	197			218	218	144	144		369	369		291	291	282	286		348	348		315	330			217	235		234	234		152	152		?	?		180	189	316	316
ML2010FB20	194	200			218	218	144	144		363	372		291	327	282	286		334	336		327	327			226	229		237	239		152	154		222	222		180	180	316	320
ML2010FB21	194	194			218	218	144	144		363	363		291	291	286	286		338	338		330	330			226	226		231	231		152	152		222	222		180	180	316	320
ML2010MR22	191	200			218	218	144	144		363	363		291	294	282	282		326	350	348	315	336			226	226		234	234		152	156		222	222		180	180	316	316
ML2010FB23	191	194			218	218	144	144		363	363		288	291	282	282		340	340		318	321			226	229		237	237		152	152		222	222		180	189	316	316
KS1991RS01	191	191			218	218	135	135		363	363		291	291	282	282		342	342		318	318			229	229		237	237		?	?		?	?		180	180	326	326
KS2001RM02	194	194			218	218	144	144		366	366		291	291	282	282		346	348		327	327			217	217		234	234		152	152		222	222		200	200	316	316
KS2003SP03	194	200			218	218	135	144		363	369		291	327	282	282		336	336		315	318			226	229		237	237		152	158		222	222		180	180	320	320
KS2003SP04	194	200			218	218	135	144		360	363		291	294	282	282		336	336		315	318			226	229		237	237		152	158		222	222		180	180	320	320
KS2003SP05	?	?			218	218	135	135		363	363		291	294	282	282		338	338		318	318			226	226		237	237		152	152		220	220		180	180	326	326
KS2009AR06	188	194			218	218	144	144		369	369		294	294	282	282		350	350		321	324			226	226		237	237		152	154		222	222		180	180	313	316
KS2009OL07	200	200			218	218	135	144		363	366		291	291	282	282		336	336		321	324			226	229		237	237		158	158		220	220		180	180	320	326
KS2009FB08	194	200			218	218	135	135		363	363		291	291	282	282		336	336		321	321			226	229		237	237		158	158		220	220		180	180	326	326
KS2009FB09	197	197			218	218	144	144		369	369		291	291	282	282		336	336		324	327			226	226		234	239	237	156	158		234	234		180	180	313	316
KS2009MY10	194	194			218	218	144	144		363	363		?	?	286	286		338	342		321	321			226	226		237	237		152	152		226	226		180	180	326	326
YN1991RS01	191	194	200		218	218	135	144		363	369		291	291	282	282		326	350		318	324	321		226	226		237	239	234	156	156		222	222		200	200	316	316
YN2010OX02	200	200			218	218	144	144		363	363		291	327	282	282		330	350		315	324			229	229		237	237		152	152		222	222		180	180	316	316
HC2010CS01	194	194			218	218	144	144		366	366		291	291	282	282		336	336		318	321			226	232		237	242		152	152		222	222		180	180	320	326
HC2010CS02	197	200			218	218	144	144		363	363		291	291	282	282		334	350		327	327			220	238		237	237		152	154		220	220		180	180	316	320
HC2010MR03	197	200	191		218	218	135	144		363	363		291	291	282	282		336	336		321	324	318	327	226	229		237	237		152	158		220	220		180	180	316	320	323	326
HC2010HM04	191	200			218	218	144	144		369	369		291	291	282	282		342	348		324	327			226	226		239	239		158	158		222	222		180	180	316	316
HC2010MR05	191	191			218	218	135	135		363	363		291	327	282	282		326	334	336	324	327			226	229		234	234		152	158		222	222		180	180	316	326
HC2010MR06	194	194			218	218	?	?		360	360		291	291	282	282		338	338		315	315			226	226		?	?		152	158		?	?		?	?	?	?
HC2010MR07	194	197			218	218	135	144		360	369		291	327	282	282		338	342		315	315			226	226		239	239		152	158		220	220		180	180	316	316
HC2010MR08	194	194			218	218	135	144		360	360		291	327	282	282		338	342		315	315			226	226		239	239		152	158		222	222		180	180	316	316
HC2010MR09	194	194			218	218	144	144		369	369		291	327	282	282		326	350		318	330			229	229		228	234		152	156		220	220		180	180	326	326
HC2010MR10	194	194			218	218	144	144		369	369		291	291	282	282		326	350		318	330			229	229		228	234		152	156		220	220		180	180	326	326
HC2010CS11	191	191			218	218	144	144		360	366		291	327	282	316		336	336		321	330			226	226		237	237		152	152		222	222		180	180	316	320
HC2010MR12	191	194			218	218	144	144		369	369		291	291	282	282		338	338		321	330			229	229		231	237		158	158		222	222		180	180	313	320
HC2010PT13	188	191			218	218	144	144		363	363		291	327	282	282		326	326		318	318			238	238		237	237		152	152		222	236		180	180	313	316	320
HC2010MR14	191	194			218	218	135	144		363	369		291	327	282	282		350	350		342	342			226	229		237	237		152	152		222	222		180	180	320	320
HC2010EP15	194	194			218	218	135	138	144	360	363		291	327	282	282		348	350		324	324			229	229		237	237		152	152		222	222		189	189	316	326
HC2010HM16	191	200			218	218	135	144		366	366		291	291	282	282		336	336		324	327	321		226	226		234	234		152	158		220	220		180	180	320	326	313
HC2010SP17	191	191			218	218	144	144		363	363		291	291	?	?		330	359		324	327			226	226		234	234		152	152		224	224		180	180	313	320
HC2010MR18	191	194			218	218	144	144		369	369		291	291	282	282		326	326		318	318			226	226		228	237		152	158		222	222		180	180	326	326
HC2010MR19	191	194			218	218	144	144		363	363		291	291	282	282		326	326		327	327			226	226		237	237		152	152		220	220		180	200	316	316
HC2010HM20	194	197			218	218	144	144		369	369		291	291	282	282		326	326		315	330			229	229		237	239		152	158		224	224		180	180	320	320
HC2010MR21	194	194			218	218	144	144		363	363		291	291	282	296		336	336		315	324			226	229		234	237		152	152		222	222		180	180	316	316
HC2010CS22	191	194			218	218	135	144		372	372		291	291	282	282		336	350		324	330			226	229		228	237		152	152		222	222		180	180	326	326
CY1991SP01	194	200			218	218	135	144		363	363		291	294	282	296		326	334	336	324	324			226	226		234	237	228	152	158		222	222		180	180	316	326
CY1991MY02	191	191			218	218	144	144		363	369		291	291	282	282		326	326		315	315			226	226		231	231		152	152		222	224		180	180	316	316
CY1992SP03	191	200			218	218	144	144		363	369		291	291	282	286	312	348	350	338	321	321			226	226		234	237		152	152		222	222		180	180	316	320	326
CY1996MR04	194	194			218	218	132	132		363	363		288	288	282	282		336	336		324	324			226	226		237	237		152	152		222	222		180	180	316	316
CY1996CM05	191	197	194		218	218	144	144		366	366		291	291	282	282		326	326		318	324	327		226	229	217	234	239		152	152		222	222		180	180	316	316
CY1996FB06	194	194			218	218	144	144		366	366		291	327	282	282		334	334		321	321			226	226		239	239		152	152		222	222		180	180	316	316
CY1998SP07	191	194			254	254	135	135		369	369		291	291	282	296		326	334		315	321	324		226	238		234	237		152	152		222	222		180	180	320	326
CY2003MY08	194	197			218	218	144	144		369	369		291	291	282	316		326	338		?	?			226	229	232	234	237		152	156		220	222	238	180	180	320	323	326
CY2009FB09	194	197			218	218	135	144		363	369		291	291	282	282		336	350		318	330			226	226		237	239		152	152		222	222		180	180	313	326	316
CH2005RS01	200	200			218	218	135	135		369	369		291	291	282	282		326	326		318	318			226	226		237	237		152	152		222	222		200	200	320	320
CH2005FB02	191	200			218	218	138	144		369	369		?	?	282	286		336	348	326	327	330			223	223		237	239		152	160		222	222		180	180	316	320
CH2005FB03	191	200			218	221	138	144		369	369		291	291	282	286		336	348		327	330			223	223		237	237		152	160		222	222		180	180	316	320
CH2006SP04	191	194			218	221	135	144		363	369		291	291	282	282		334	334		315	324			226	226		237	237		152	152		222	222		180	180	316	316
CH2009MR05	191	197			218	218	144	144		369	369		291	291	296	296		336	336		318	327			226	226		237	237		152	158		222	222		180	180	313	326
CH2009MR06	191	194			218	218	135	135		?	?		288	294	282	282		326	326		327	327			226	226		237	237		152	152		222	238		180	180	320	320
CH2009MR07	194	194			218	218	144	144		369	369		291	291	282	316		326	350	348	321	321			226	232		234	237		152	158		222	222		180	180	313	326
CH2009MR08	191	194			218	218	135	144		366	366		291	291	282	282		336	348		330	336			229	229		237	237		152	156		222	222		180	180	313	320
CH2009AN09	191	191			218	218	135	135		363	363		294	330	282	282		326	326		327	327			226	226		237	237		152	152		238	238		180	180	320	320
CH2009MR10	191	194	197	200	218	218	144	144		?	?		?	?	282	282		?	?		327	327			214	214		234	237		152	152		222	238		180	180	320	320
CH2009AT11	194	200			218	218	135	144		363	366		291	291	282	316		346	348		318	318			229	238		237	239		152	152		222	222		180	180	316	316
CH2009MR12	194	200			218	218	135	144		369	369		291	291	282	282		336	361		318	336			214	229		231	239		158	158		222	222		180	180	316	316
CH2009FB13	200	200			218	218	135	135		363	369		291	291	282	282		348	350		321	321			226	226		237	237		147	147		222	222		180	180	316	316
CH2009FB14	191	191			218	218	144	144		363	363		291	291	282	282		348	350		308	308			229	229		237	237		158	158		222	224		180	180	329	329
CH2009MR15	197	197			218	218	144	144		363	369		291	291	282	282		334	340		321	321			226	226		237	237		152	152		222	222		180	180	316	316
CH2009MR16	197	200			218	218	144	144		366	369		291	291	282	282		330	330		321	327			226	226		234	237		152	160		222	222		180	180	316	326
CH2009MR17	191	191			218	218	135	138	144	363	369		291	327	282	282		350	350		321	321			226	226		231	231		152	152		220	220		189	189	320	320
CH2009OL18	191	200			218	218	135	147		363	372		291	291	282	282		338	342		327	330			211	229		237	237		152	160		?	?		180	180	320	326
CH2009MR19	191	194			218	218	135	144		366	369		291	291	282	282		348	350		327	330			229	229		237	237		152	158		224	224		180	180	316	316
CH2009LR20	191	194			218	218	135	135		366	366		291	291	282	282		330	350		318	327			229	229		234	237		152	152		222	222		180	180	316	316
CH2009MR21	194	197			218	218	144	144		363	366		291	291	282	282		340	340		327	327			226	226		237	237		152	156		220	220		180	180	313	316
CH2009BG22	194	197			218	218	144	144		363	369		291	291	282	282		340	340		315	327	324		223	226	232	237	237		152	156		220	222		180	180	313	316
CH2009FB23	191	194			218	218	135	135		363	369		291	291	282	282		330	350		318	327			229	229		234	237		152	152		222	222		180	180	316	316
CH2009MR24	188	188			218	218	144	144		363	363		291	291	282	282		326	334		318	318			232	232		237	237		152	152		222	222		180	180	316	316
CH2009LR25	194	200			218	218	144	144		363	369		291	291	282	316		334	348		327	327			220	229		237	237		152	152		222	222		180	206	316	320
CH2009MR26	191	194			218	218	144	144		363	363		288	291	282	282		326	326		324	324			217	229		237	237		152	152		226	226		180	180	316	320
CH2009LR27	194	216			218	218	144	144		363	369	366	288	288	282	316		334	336		324	324			229	229		234	234		152	152		222	236		180	180	320	320
CH2010MR28	191	194			218	218	135	144		363	369		294	294	282	316		352	352		315	315			226	226		237	237		152	158		222	222		180	180	316	326
